# Supplementary material for: Derivation of a robust mouse mammary organoid system for studying tissue dynamics
Source: Oxford University Press journal article supplement (doi:10.1242/dev.145045), 2016-01-01
Supplement: dev145045supp.pdf [file dev145045supp.pdf]

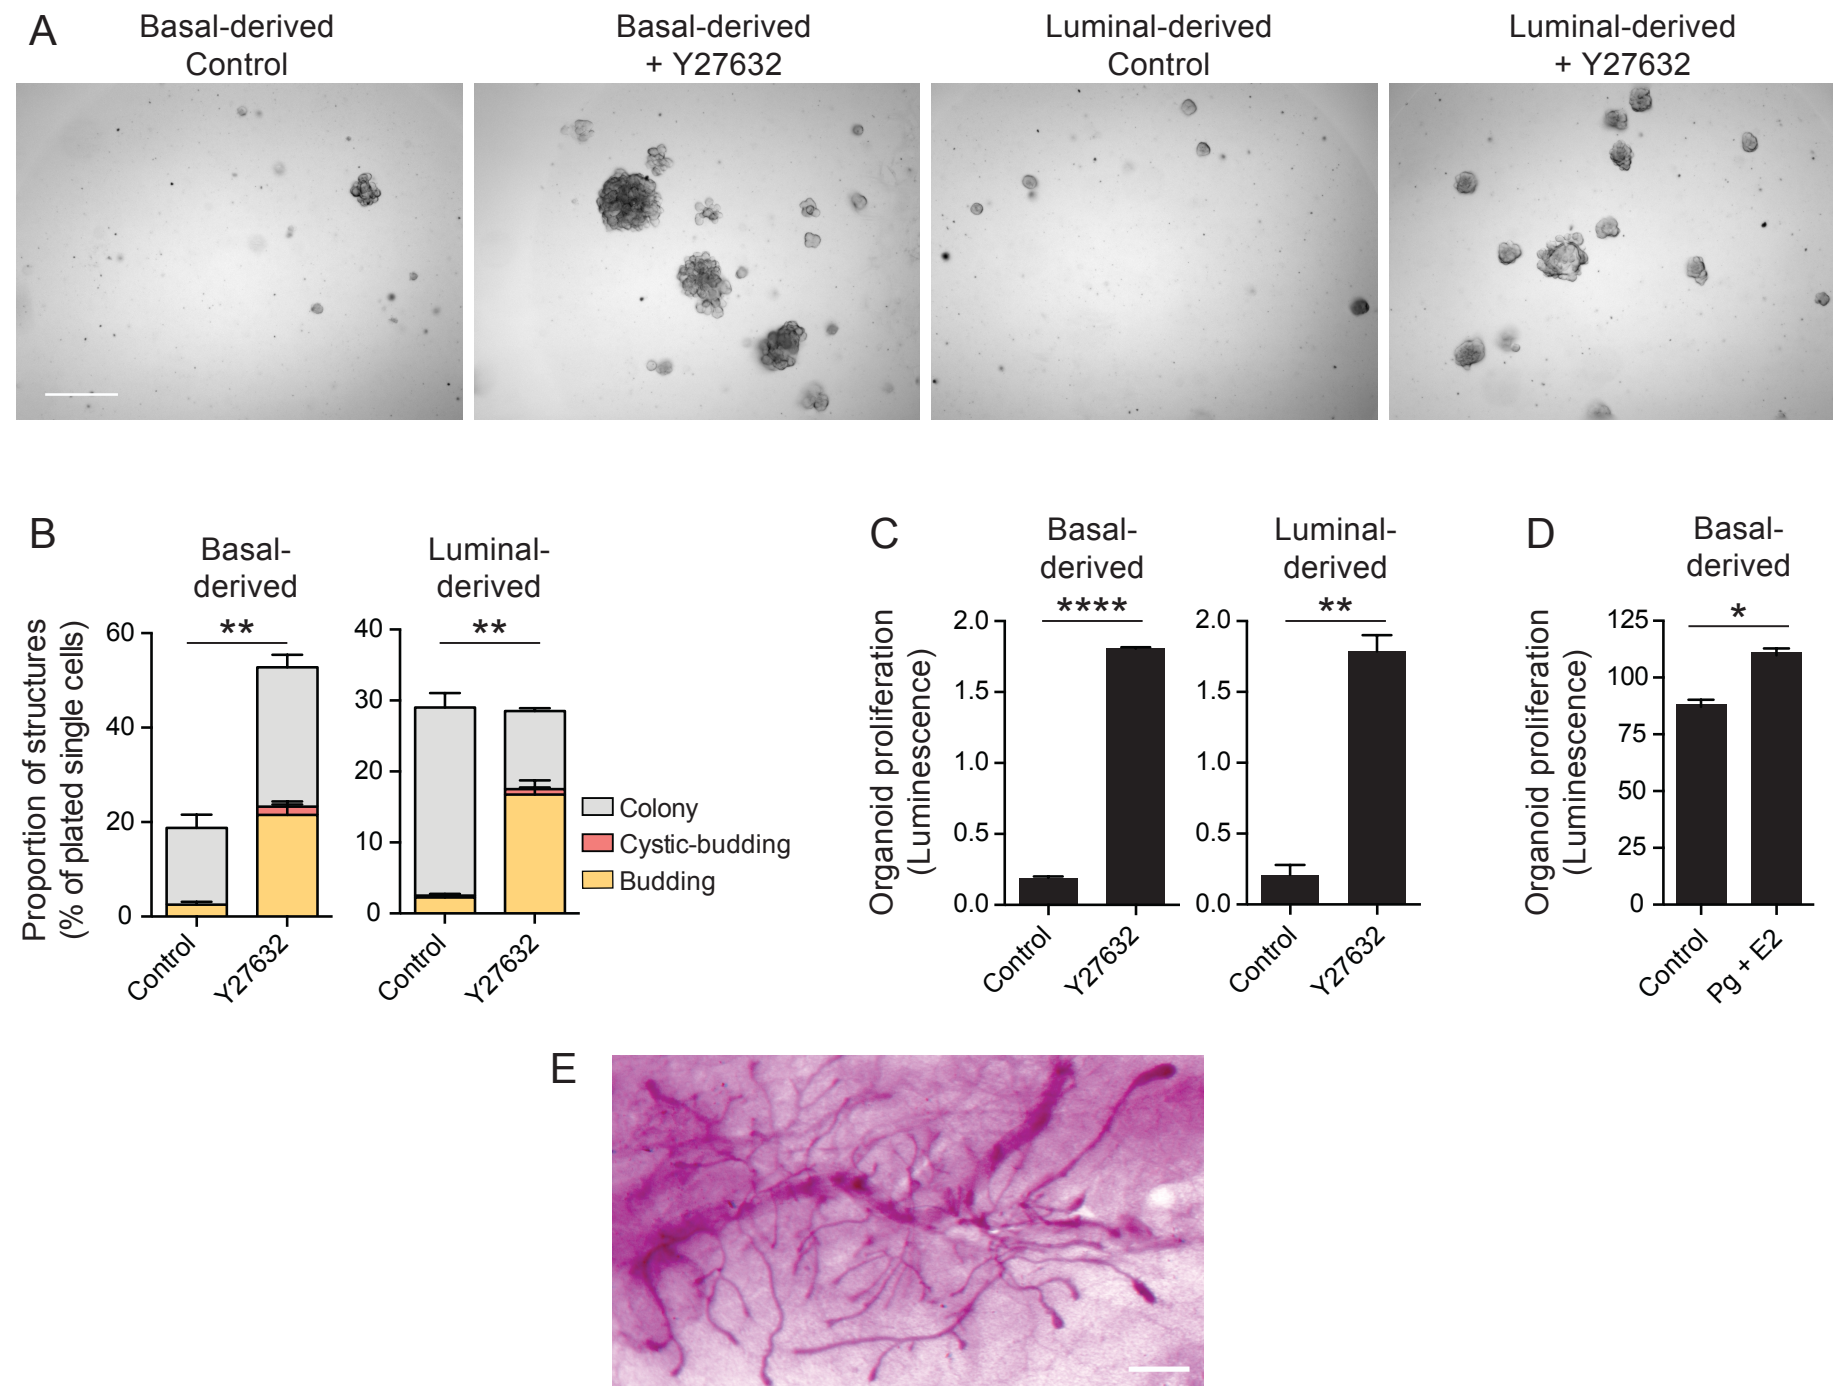

**Supplementary Figure S1. *In vitro* and *in vivo* growth properties of mammary organoids.** (A-C) Representative images showing structure types (A; scale bar = 200  $\mu$ m), quantification of structure types (B), and quantification of proliferation measured by the cell titer-glow cell viability assay (C) of 2-week old organoids grown from single basal or luminal cells with or without ROCK inhibition by Y27632 for the first three days. In panel B, P values indicate significant differences between the total number of budding + cystic budding structures. (D) Quantification of organoid proliferation in 2-week old cultures in the presence or absence of progesterone (Pg) and  $\beta$ -estradiol (E2). Mean  $\pm$  S.E.M. B-D show representative data for 2-3 experiments. (E) Whole-mount staining of mammary gland outgrowths 5 weeks following transplantation of single cells isolated from basal-derived organoids into a cleared mammary fat pad. Outgrowths were observed in 4 out of 6 injected mammary fat pads. Scale bar = 1 mm.

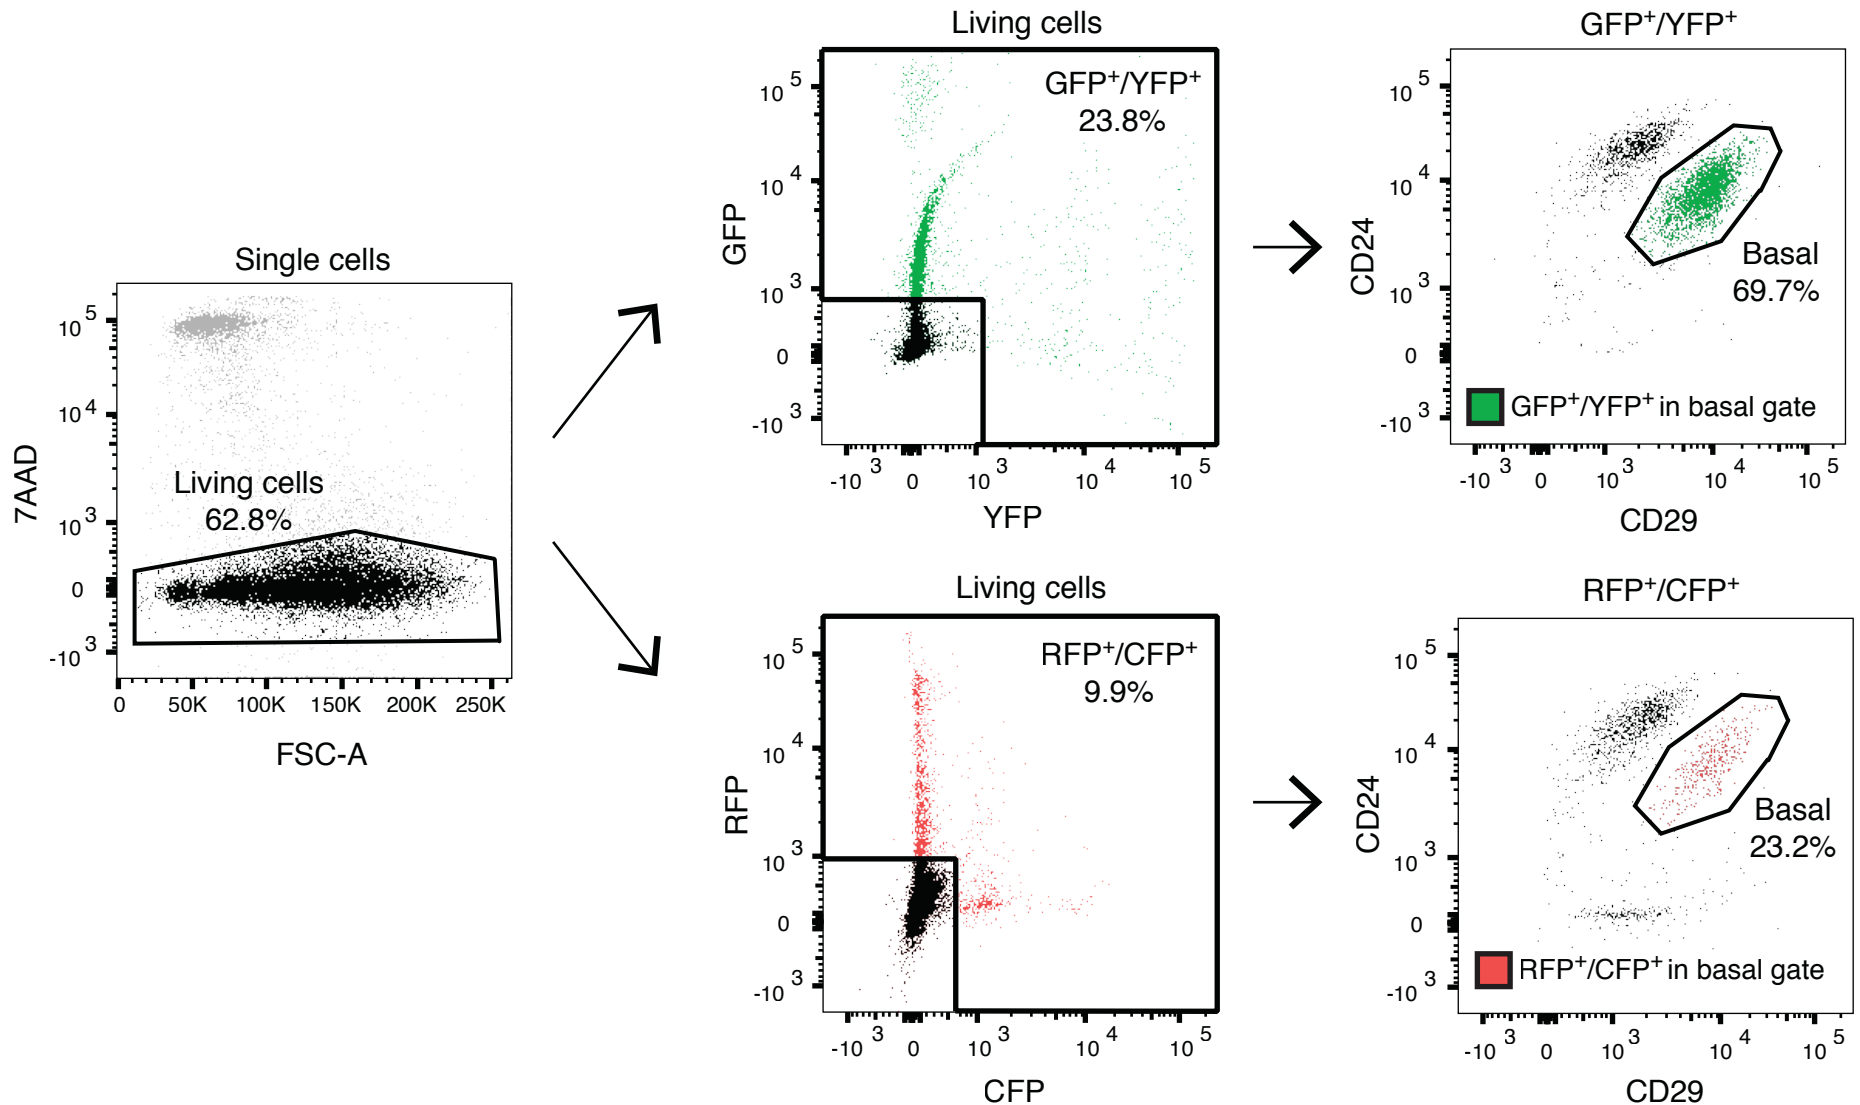

**Supplementary Figure S2. Sorting strategy for Confetti-fluorescent basal cells.** Live cells from a K5-rtTA/TetO-cre/R26R-confetti mouse were analysed by flow cytometry and gated for either GFP<sup>+</sup> and YFP<sup>+</sup> or RFP<sup>+</sup> and CFP<sup>+</sup> cells. GFP<sup>+</sup>/YFP<sup>+</sup> or RFP<sup>+</sup>/CFP<sup>+</sup> cells within the basal gates of CD24/CD29 plots were collected and organoids were generated. Representative plots for two independent experiments.



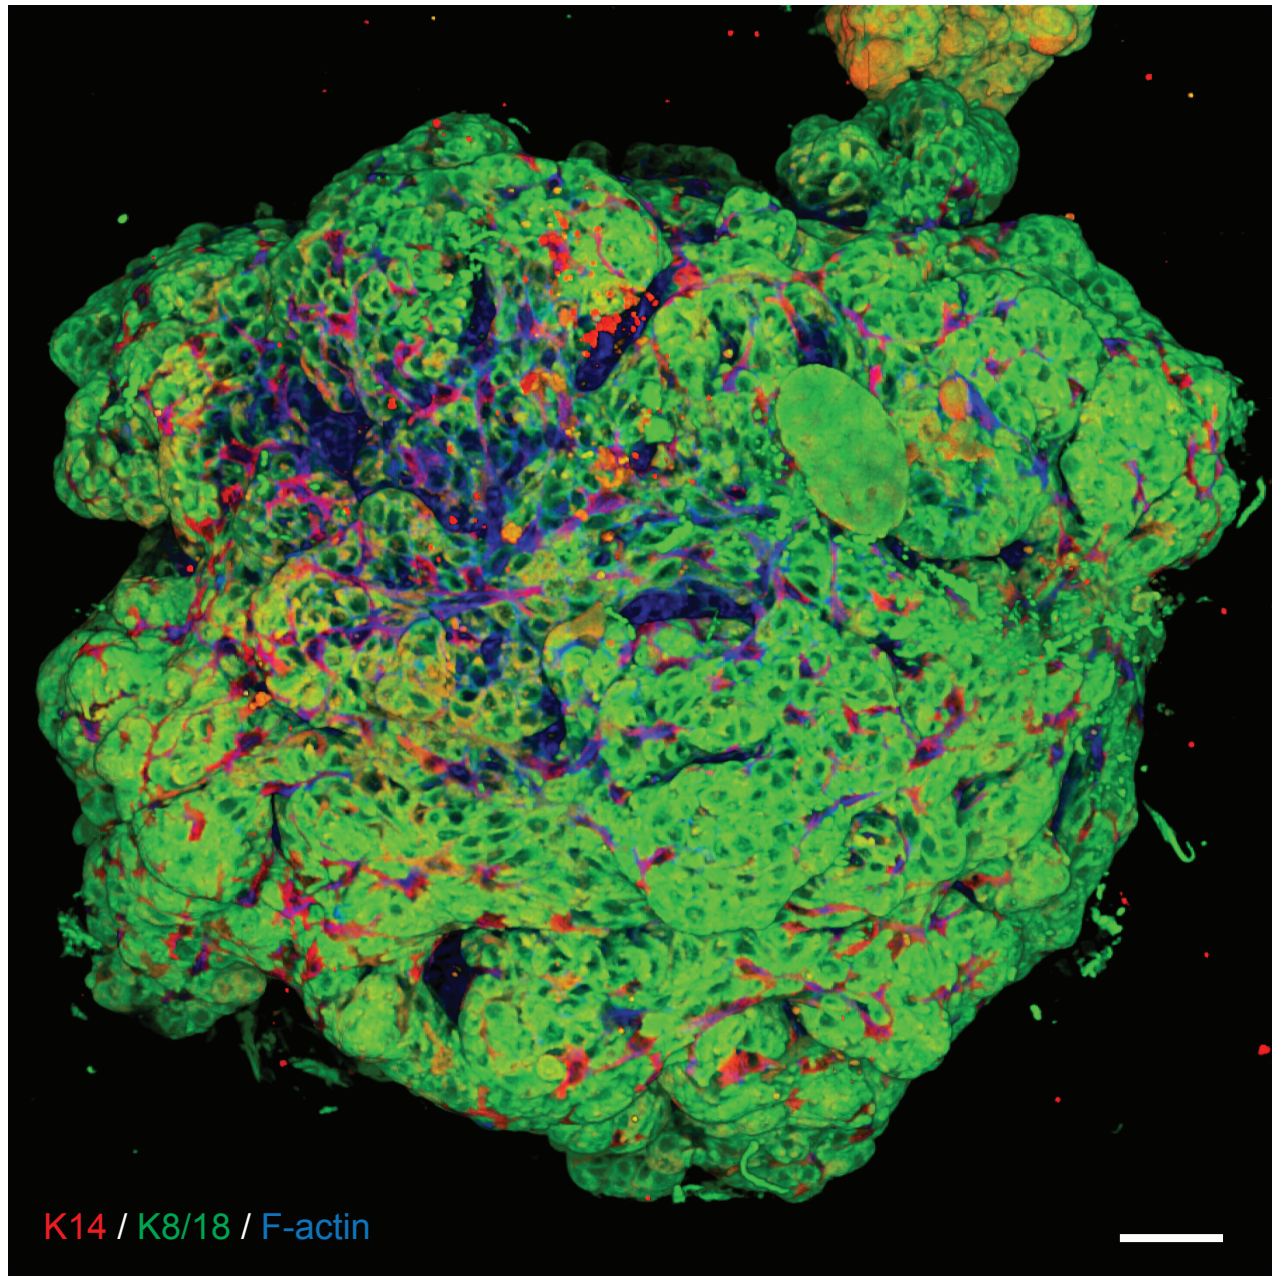

**Supplementary Figure S3. Passaged basal organoids comprise both luminal and basal cells.** Whole-mount 3D confocal image of a basal-derived organoid from cells cultured for 4 weeks with weekly passage, labeled for K8/18, K14 and F-actin. Scale bar: 10  $\mu$ m. Representative example of three independent experiments.

Elf5<sup>+</sup>/GFP<sup>+</sup> luminal progenitor

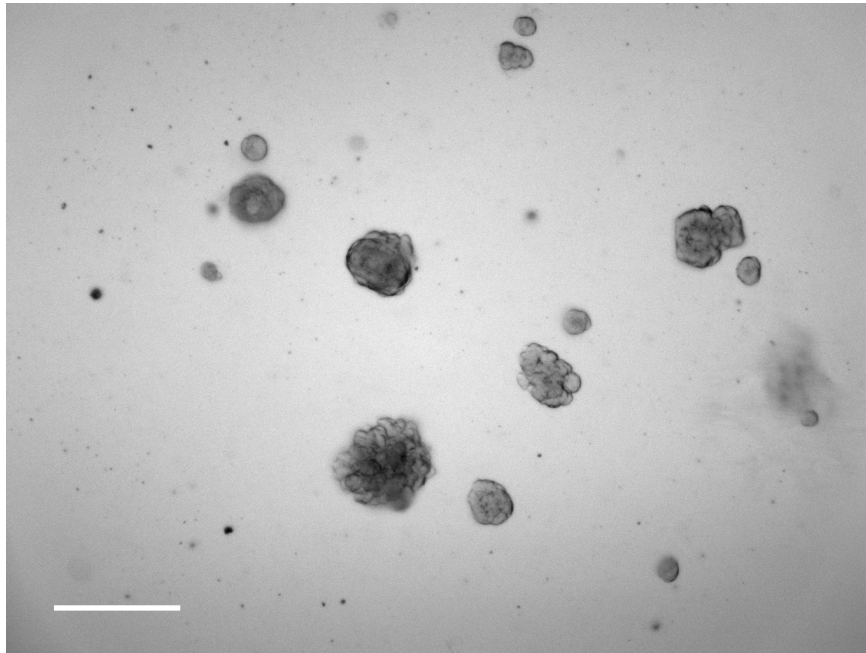

Elf5<sup>-</sup>/GFP<sup>-</sup> mature luminal

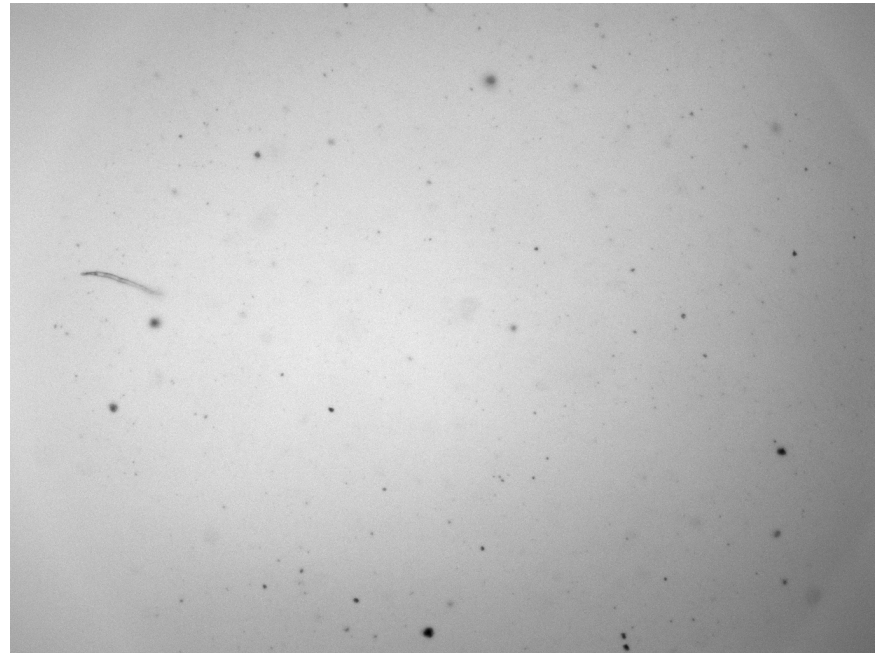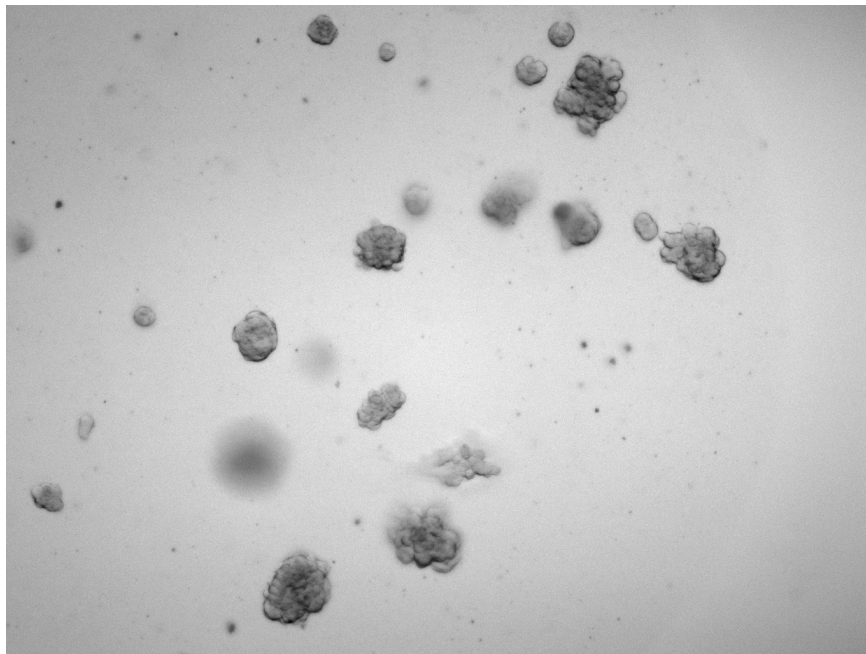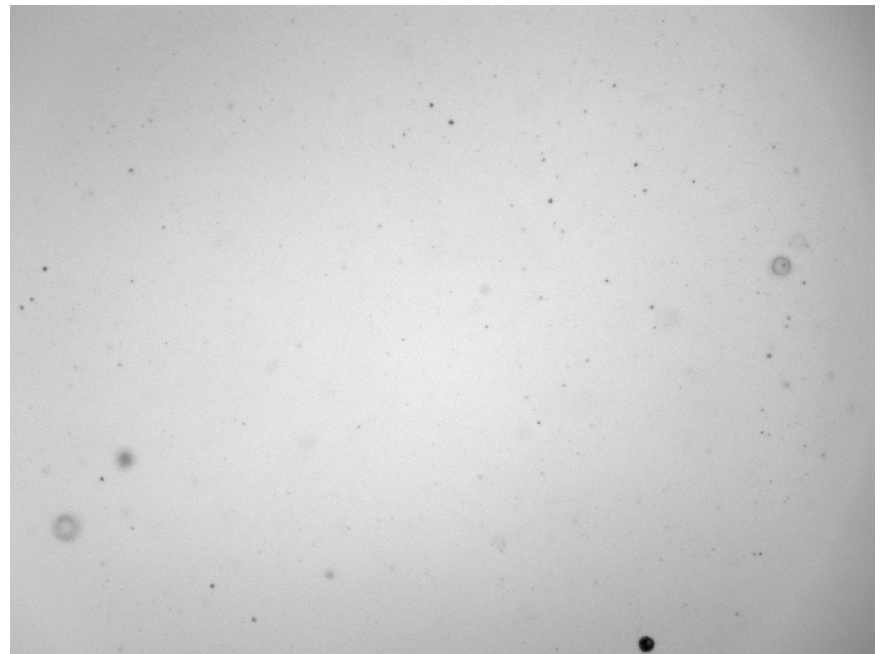

**Supplementary Figure S4. Elf5<sup>-</sup>/GFP<sup>-</sup> mature luminal cells lack the potential to form organoids.** Representative bright-field images of 12 day-old organoids derived from either Elf5<sup>+</sup>/GFP<sup>+</sup> luminal progenitor or Elf5<sup>-</sup>/GFP<sup>-</sup> mature luminal cells isolated from a Elf5-rtTA-IRES-GFP mouse as described in Fig. 3A. Scale bar: 320  $\mu$ m. Representative images of three independent experiments.



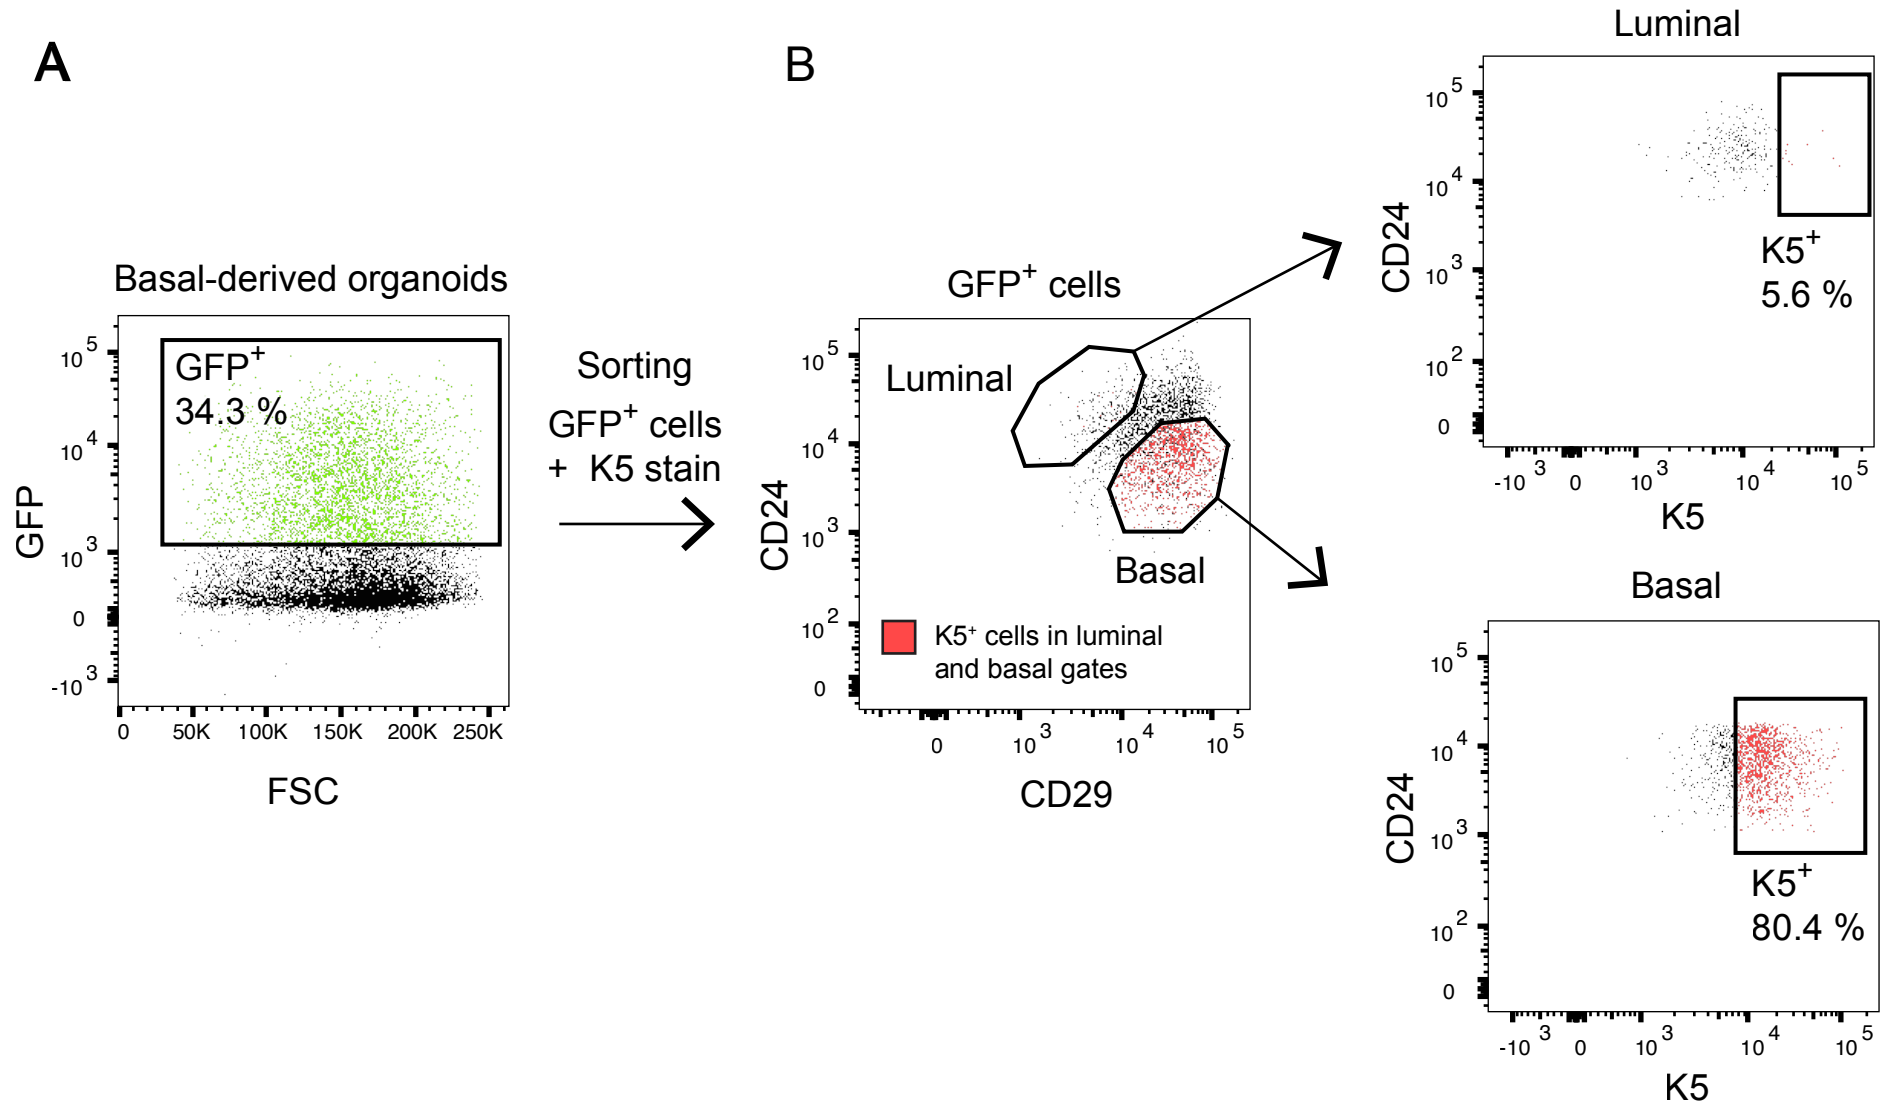

**Supplementary Figure S5. Some luminal cells differentiated from K5<sup>+</sup>/GFP<sup>+</sup> basal cells retain GFP expression.** (A) Single cells of organoids generated from K5<sup>+</sup>/GFP<sup>+</sup> basal cells isolated from a K5-rtTA-IRES-GFP mouse were stained for CD24 and CD29, and the GFP<sup>+</sup> subset was sorted. (B) Sorted cells from panel A were fixed, permeabilised and re-stained for K5, while CD24 and CD29 expression was maintained. Luminal and basal gates in the CD24/CD29 plot and K5<sup>+</sup> gates in the CD24/K5 plots were based on uncultured cells from a K5-rtTA-IRES-GFP control mouse. Representative data of two independent experiments.

| Reagent                         | Concentration | Company                  |
|---------------------------------|---------------|--------------------------|
| Advanced DMEM/F12*              | 1x            | Gibco                    |
| Penicillin/Streptomycin*        | 1x            | Thermo Fisher Scientific |
| Glutamax*                       | 1x            | Thermo Fisher Scientific |
| Hepes*                          | 10 mM         | Thermo Fisher Scientific |
| Insulin*                        | 5 µg/ml       | Roche                    |
| Hydrocortisone*                 | 100 ng/ml     | Sigma                    |
| B27                             | 1x            | Thermo Fisher Scientific |
| N-Acetylcysteine                | 1.25 µM       | Sigma                    |
| EGF                             | 50 ng/ml      | Sigma                    |
| FGF-basic (FGF2)                | 5 ng/ml       | Sigma                    |
| FGF10                           | 10 ng/ml      | Peprtech                 |
| Wnt3a                           | 10 ng/ml      | Peprtech                 |
| Heparin                         | 4 µg/ml       | Sigma                    |
| Y-27632 (Rock Inhibitor)        | 5 µM          | Tocris                   |
| R-Spondin2 (conditioned medium) | 0.5%          | In-house                 |
| Prolactin                       | 5 µg/ml       | **                       |

\* Minimal medium components for prolactin treatment

\*\* Prolactin was generously provided by A. Parlow (National Hormone and Pituitary Program).

### Supplementary Table ST1. Overview of medium components.



| Antigen                           | Clone                | Conjugate               | Species | Supplier                                   | Dilution |
|-----------------------------------|----------------------|-------------------------|---------|--------------------------------------------|----------|
| <i>Flow cytometry:</i>            |                      |                         |         |                                            |          |
| CD24                              | M1/69                | Pacific Blue            | Rat     | BD Pharmingen                              | 1/200    |
| CD29                              | HM $\beta$ 1-1       | APC/cy7                 | Rat     | BD Pharmingen                              | 1/200    |
| CD31                              | MEC13.3              | APC                     | Rat     | BD Pharmingen                              | 1/50     |
| CD45                              | 30-F11               | APC                     | Rat     | BD Pharmingen                              | 1/100    |
| TER119                            | Ter-119              | APC                     | Rat     | BD Pharmingen                              | 1/100    |
| CD24                              | M1/69                | APC                     | Rat     | BD Pharmingen                              | 1/200    |
| K5                                | Polyclonal Poly19055 | Unconjugated            | Rabbit  | BioLegend (formerly Covance)               | 1/500    |
| <i>Immuno-Fluorescence:</i>       |                      |                         |         |                                            |          |
| K14                               | Polyclonal           | Unconjugated            | Rabbit  | Thermo-Fisher Scientific                   | 1/500    |
| K8/18                             | (TROMA-I)            | Unconjugated            | Rat     | DSHB (University of Iowa)                  | 1/200    |
| p63                               | 4A4                  | Unconjugated            | Mouse   | Abcam                                      | 1/200    |
| Ecadherin                         | E-CCD2               | Unconjugated            | Rat     | Zymed (Life Technologies)                  | 1/400    |
| ER $\alpha$                       | MC-20 Polyclonal     | Unconjugated            | Rabbit  | Santa Cruz                                 | 1/200    |
| GFP                               | Polyclonal           | Unconjugated            | Chicken | Abcam                                      | 1/250    |
| Milk                              | Polyclonal           | Unconjugated            | Rabbit  | Accurate Chemical & Scientific Corporation | 1/500    |
| F-actin (Phalloidin)              | N/A                  | Alexa-fluor-555 / 647   | N/A     | Molecular Probes                           | 1/100    |
| DAPI                              | N/A                  | Unconjugated            | N/A     | Thermo-Fisher Scientific                   | 1/400    |
| Rat-IgG                           | N/A                  | Biotin                  | Rabbit  | Vector                                     | 1/200    |
| Biotin (Streptavidin)             | N/A                  | Pacific Blue            | N/A     | Life Technologies                          | 1/300    |
| Rabbit / mouse / rat / chicken Ig | N/A                  | Alexa-fluor-488/555/647 | Donkey  | Molecular Probes                           | 1/400    |

**Supplementary Table ST2. Overview of antibodies.**
